# Supplementary material
Source: ML conference proceedings conference paper supplement (https://openreview.net/forum?id=tIjRAiFmU3y)
Supplement: supplementary_material [file attachment]

# SUPPLEMENTARY MATERIALS FOR "AN UNSUPER- VISED DEEP APPROACH FOR REAL-WORLD IMAGE DENOISING"

**Anonymous authors**

Paper under double-blind review

## 1 VISUAL RESULTS ON REAL WORLD NOISE

We show visual results on nature real world noise dataset in 1.1 and real fluorescence microscopy dataset in 1.2. Moreover, ten real noisy images are captured by consumer cameras with ISO=3200 or 320. Similar to the CC dataset, we crop a  $512 \times 512$  region in each image to evaluate the performance NN+BM3D, see 1.3.

### 1.1 VISUAL EXAMPLE OF CC, POLYU

We show visual results of ten noisy images from CC (Nam et al., 2016) and PolyU (Xu et al., 2018a) datasets. BM3D (Dabov et al., 2007), DnCNN (Zhang et al., 2017), NC (Lebrun et al., 2015), MCWNNM (Xu et al., 2017) and TWSC (Xu et al., 2018b) are evaluated for comparison. See CC's results in page 2, 3 and PolyU's results in page 4, 5.

### 1.2 VISUAL EXAMPLE OF FMDD

Two images from FMDD Zhang et al. (2019) datasets are evaluated for visual comparisons. We compared our approach with VST method (Makitalo & Foi, 2012), See page 6.

### 1.3 VISUAL EXAMPLES OF REAL IMAGE

Ten real noisy images are evaluated for visual comparisons. The results of three traditional methods (BM3D (Dabov et al., 2007), MCWNNM (Xu et al., 2017) and NC (Lebrun et al., 2015)) and three deep learning methods (VDN (Yue et al., 2019), DnCNN (Zhang et al., 2017) and FFDNet (Zhang et al., 2018)) are shown here. See Figure 4 in page 7, 8, 9.

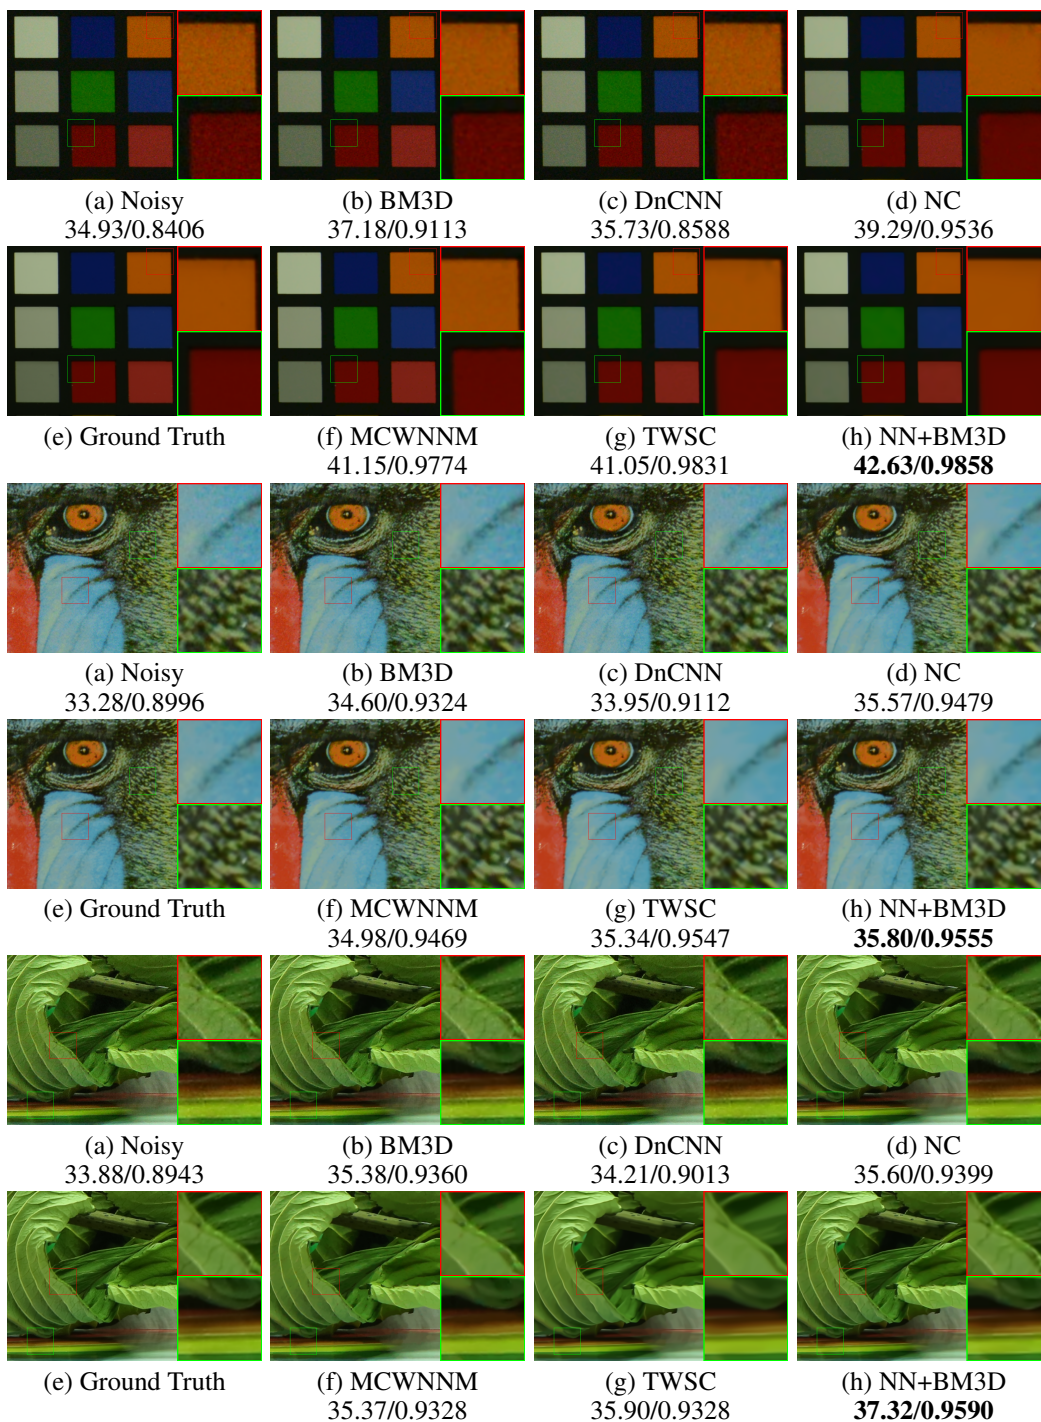



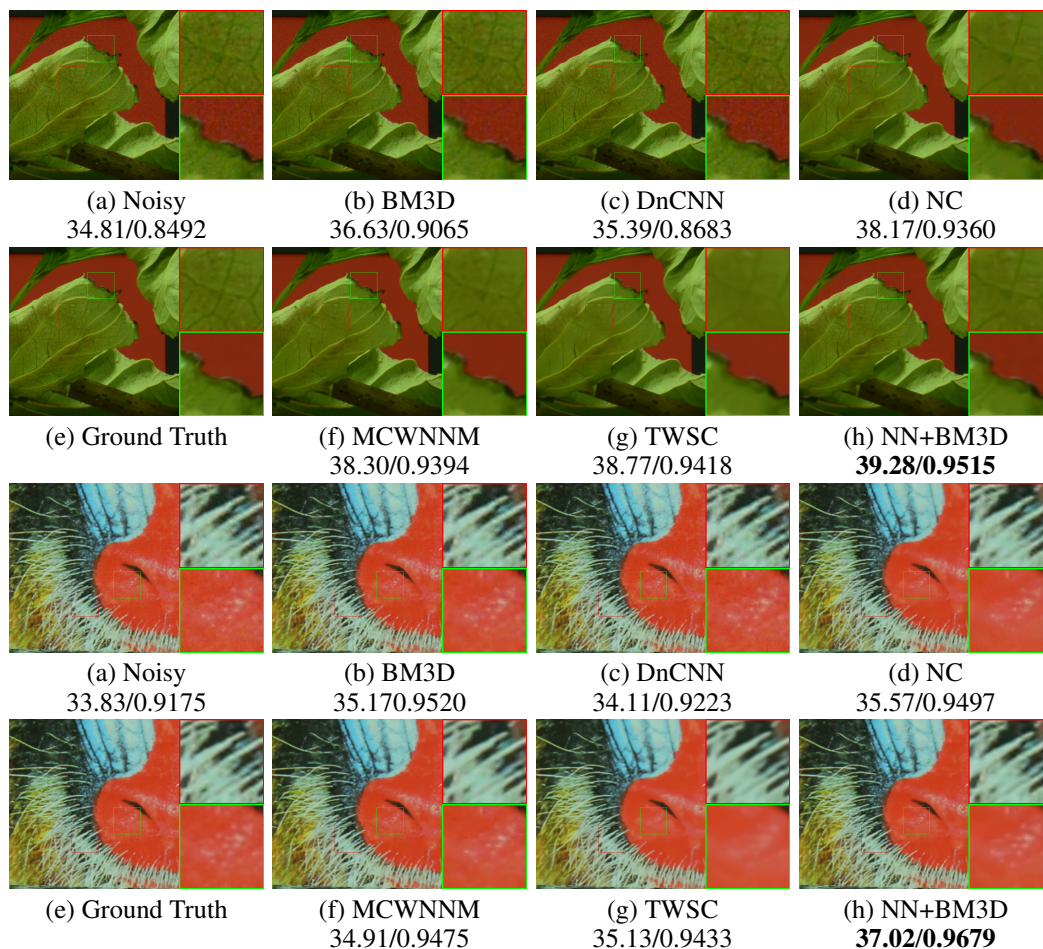

Figure 1: Visual results and PNSR/SSIM of five noisy images from CC.

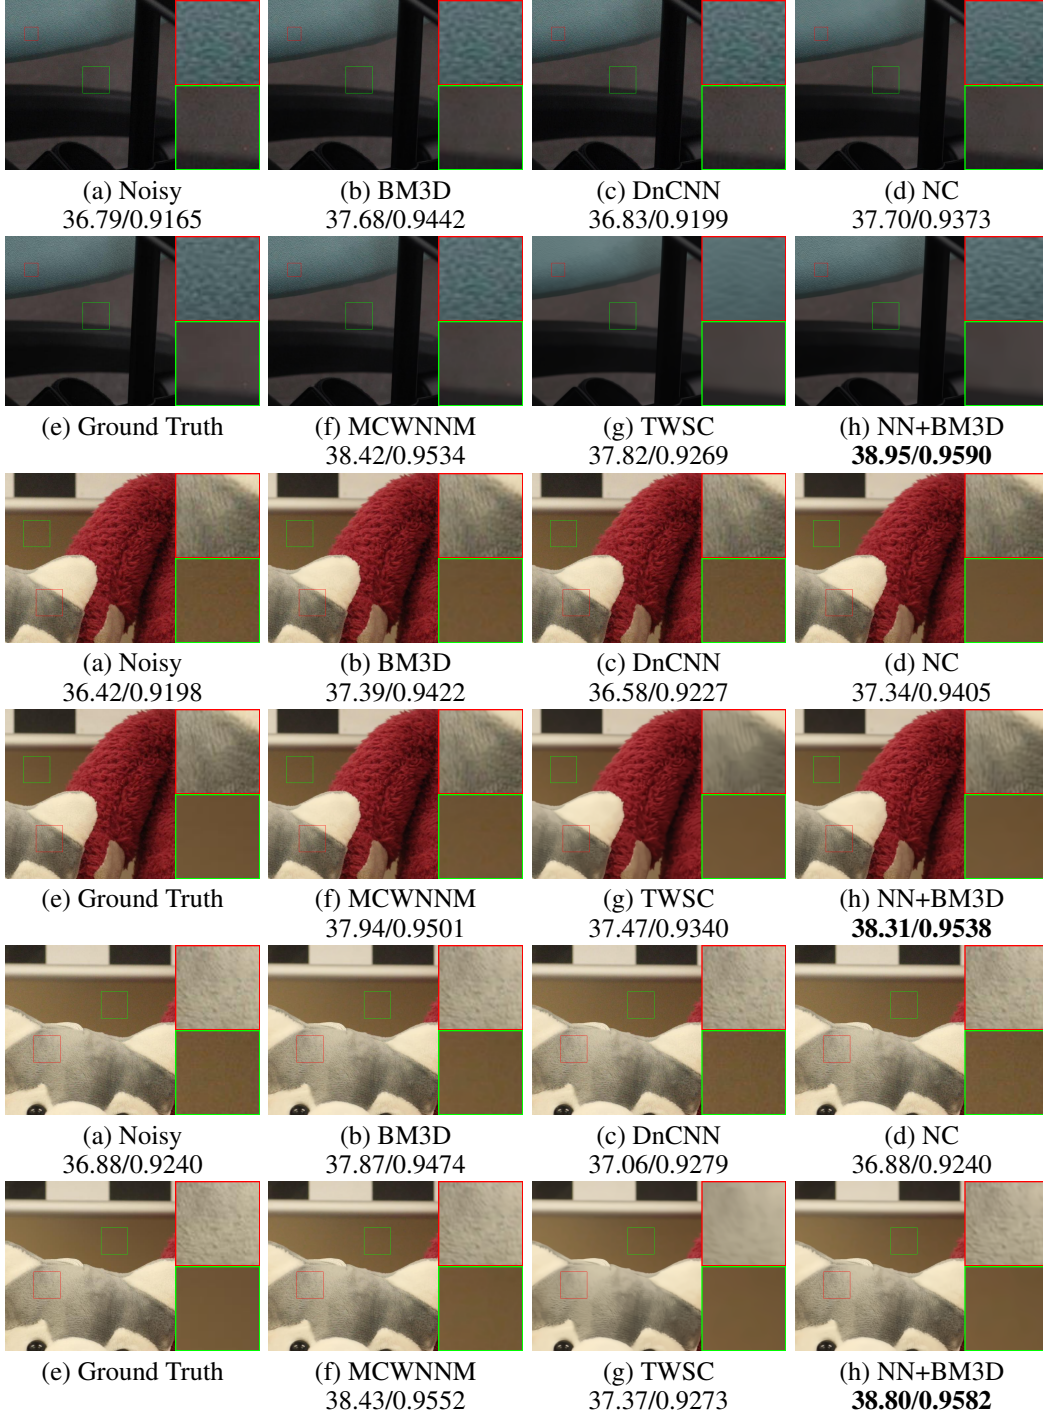

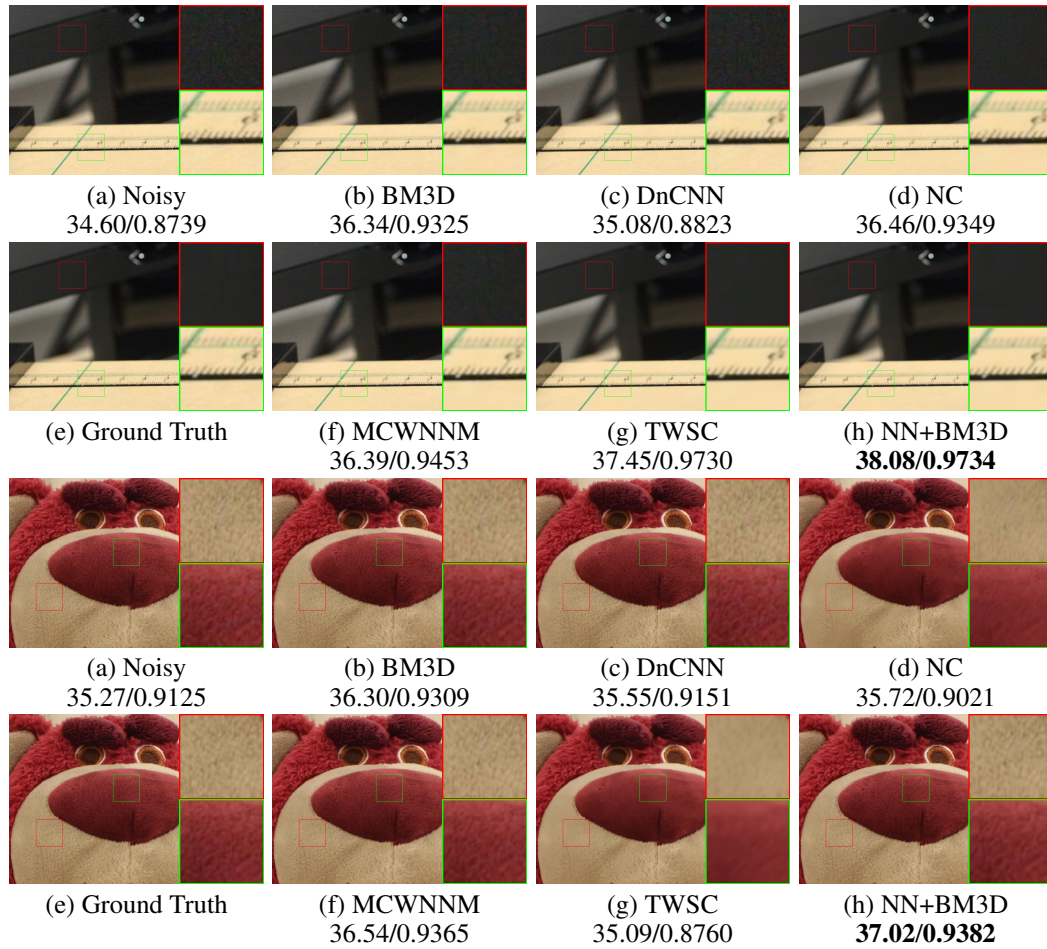

Figure 2: Visual results and PSNR/SSIM of five noisy images from PolyU.



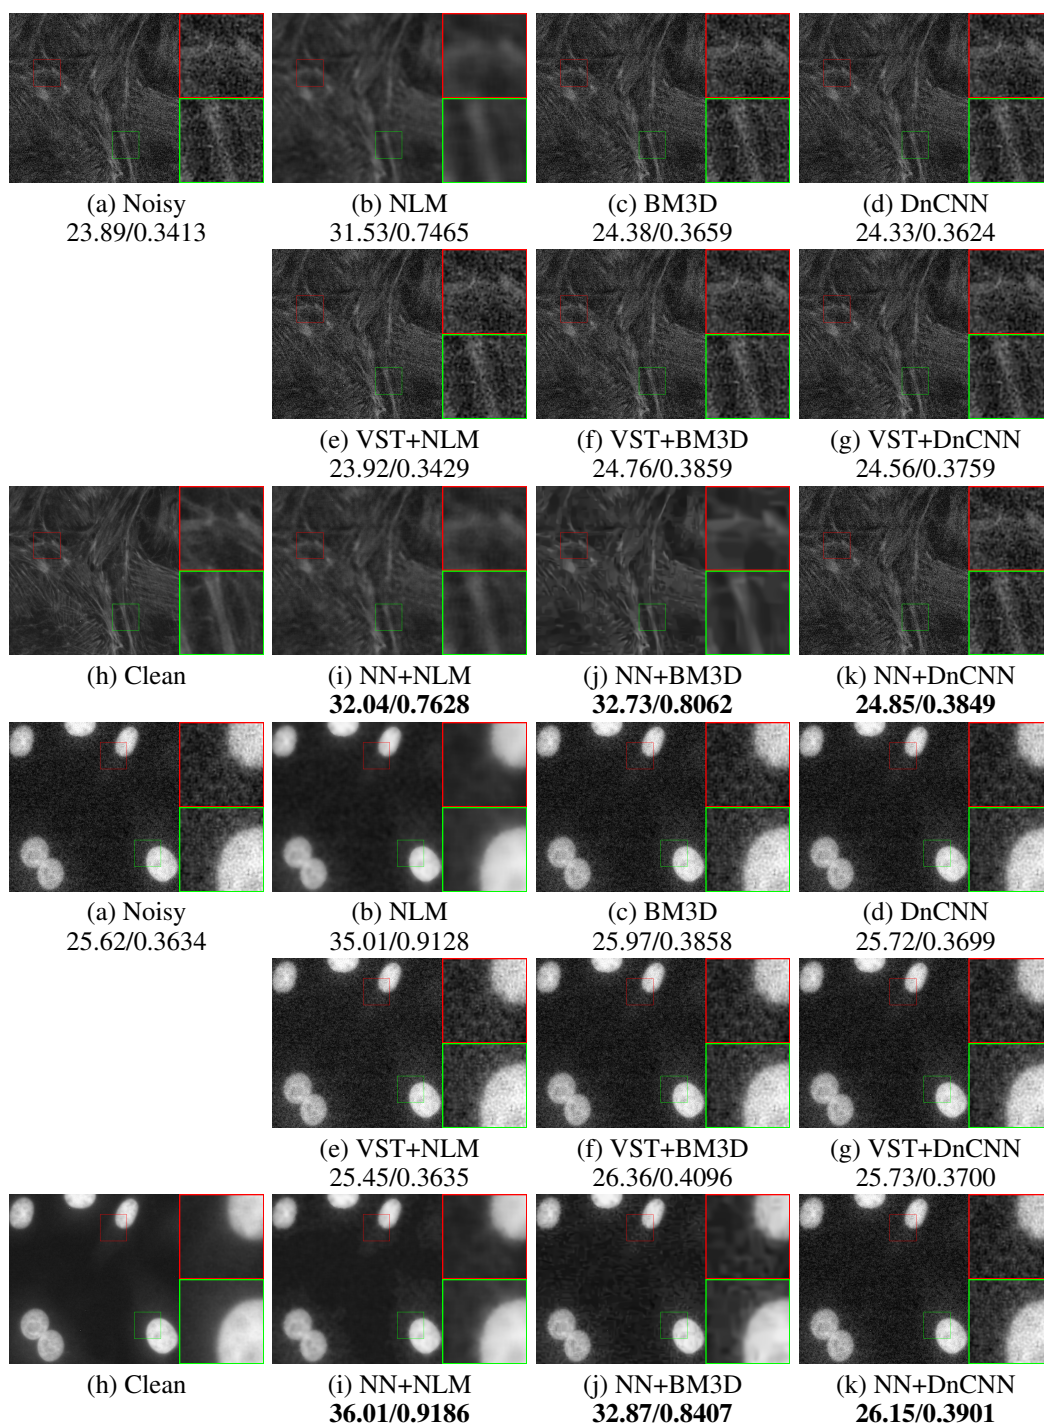

Figure 3: Visual results and PSNR/SSIM of two noisy images from FMDD.



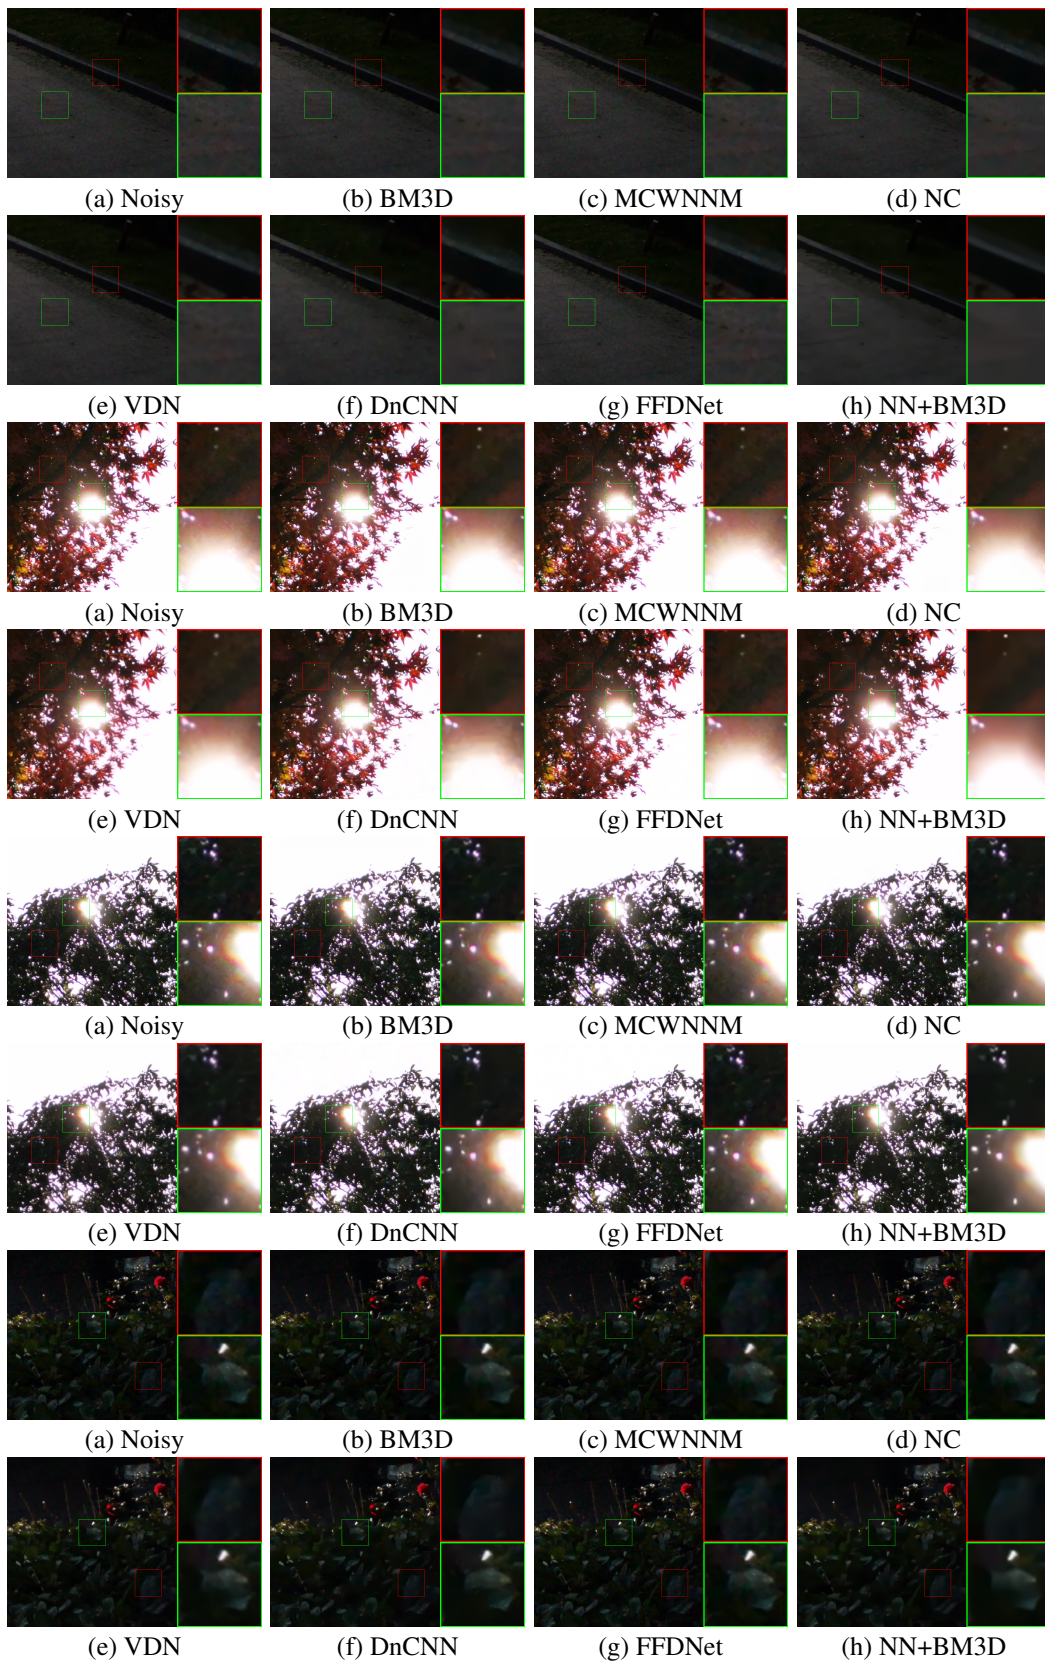

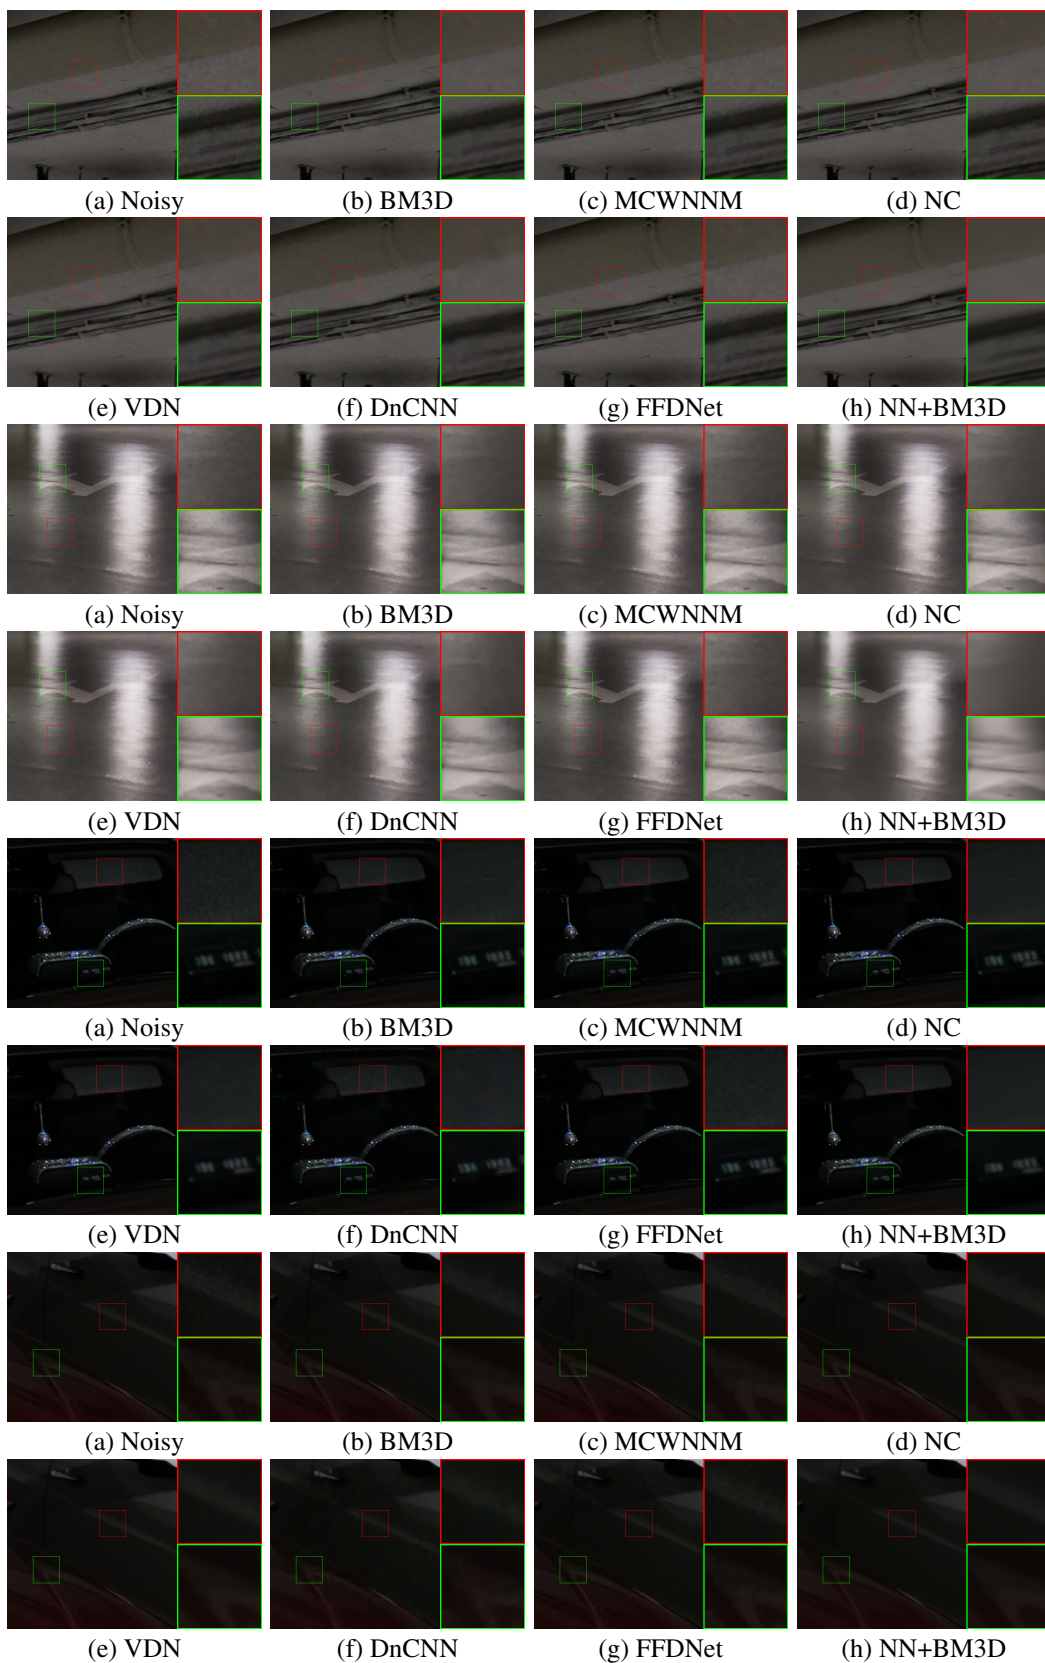



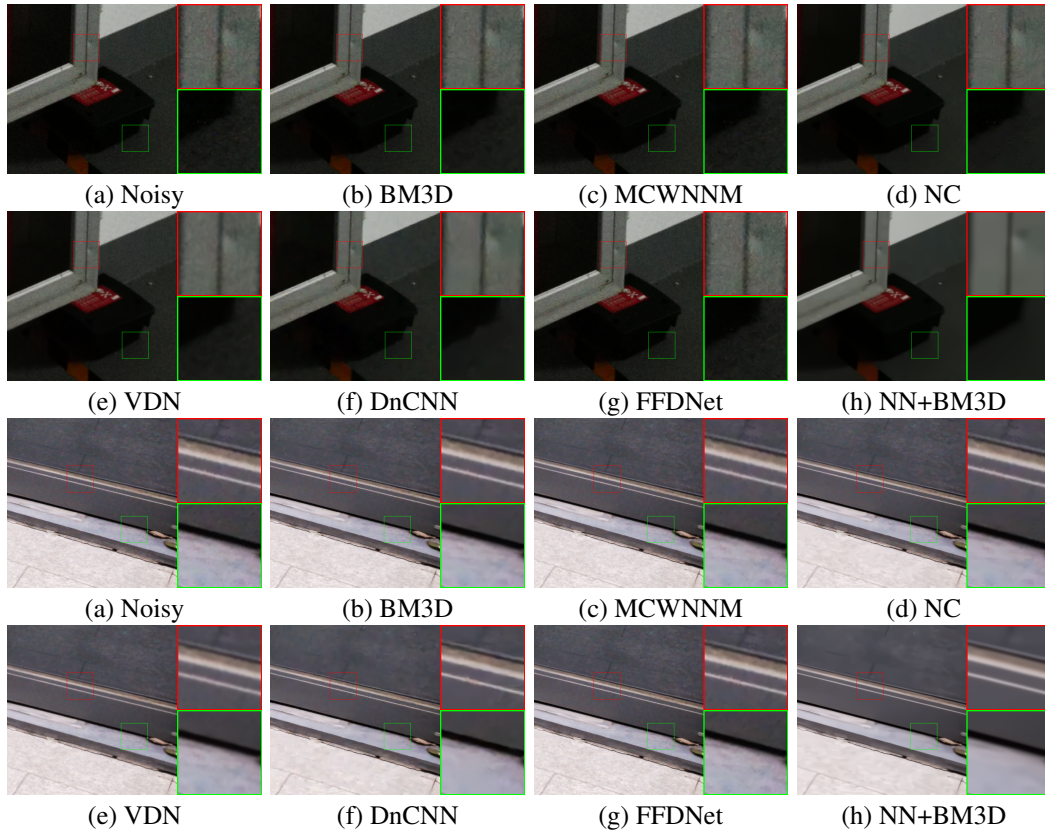

Figure 4: Visual results for real-world image denoising.

## REFERENCES

- Kostadin Dabov, Alessandro Foi, Vladimir Katkovnik, and Karen Egiazarian. Color image denoising via sparse 3d collaborative filtering with grouping constraint in luminance-chrominance space. In *ICIP*, volume 1, pp. I–313. IEEE, 2007.
- Marc Lebrun, Miguel Colom, and Jean-Michel Morel. The noise clinic: a blind image denoising algorithm. *Image Processing On Line*, 5:1–54, 2015.
- Markku Makitalo and Alessandro Foi. Optimal inversion of the generalized anscombe transformation for poisson-gaussian noise. *IEEE Trans. Image Process.*, 22(1):91–103, 2012.
- Seonghyeon Nam, Youngbae Hwang, Yasuyuki Matsushita, and Seon Joo Kim. A holistic approach to cross-channel image noise modeling and its application to image denoising. In *CVPR*, pp. 1683–1691, 2016.
- Jun Xu, Lei Zhang, David Zhang, and Xiangchu Feng. Multi-channel weighted nuclear norm minimization for real color image denoising. In *ICCV*, pp. 1096–1104, 2017.
- Jun Xu, Hui Li, Zhetong Liang, David Zhang, and Lei Zhang. Real-world noisy image denoising: A new benchmark. *arXiv:1804.02603*, 2018a.
- Jun Xu, Lei Zhang, and David Zhang. A trilateral weighted sparse coding scheme for real-world image denoising. In *ECCV*, pp. 20–36, 2018b.
- Zongsheng Yue, Hongwei Yong, Qian Zhao, Deyu Meng, and Lei Zhang. Variational denoising network: Toward blind noise modeling and removal. In *NIPS*, pp. 1688–1699, 2019.
- Kai Zhang, Wangmeng Zuo, Yunjin Chen, Deyu Meng, and Lei Zhang. Beyond a gaussian denoiser: Residual learning of deep cnn for image denoising. *IEEE Trans. Image Process.*, 26(7):3142–3155, 2017.
- Kai Zhang, Wangmeng Zuo, and Lei Zhang. Ffdnet: Toward a fast and flexible solution for cnn-based image denoising. *IEEE Trans. Image Process.*, 27(9):4608–4622, 2018.
- Yide Zhang, Yinhao Zhu, Evan Nichols, Qingfei Wang, Siyuan Zhang, Cody Smith, and Scott Howard. A poisson-gaussian denoising dataset with real fluorescence microscopy images. In *CVPR*, pp. 11710–11718, 2019.
